# Supplementary material for: Optimization of Pore Characteristics of Graphite-Based Anode for Li-Ion Batteries by Control of the Particle Size Distribution
Source: MDPI journal article supplement (doi:10.3390/ma16216896), 2023-10-27
Supplement: s1 [file s1]

## Supplementary Information

**Table S1.** Tap density based on the fraction of small graphite particles

| Xs                       | 0    | 10   | 20   | 30   | 40   | 50   | 60   | 80   | 90   | 100  |
|--------------------------|------|------|------|------|------|------|------|------|------|------|
| Tap<br>density<br>(g/ml) | 0.27 | 0.28 | 0.28 | 0.32 | 0.35 | 0.32 | 0.31 | 0.31 | 0.26 | 0.23 |

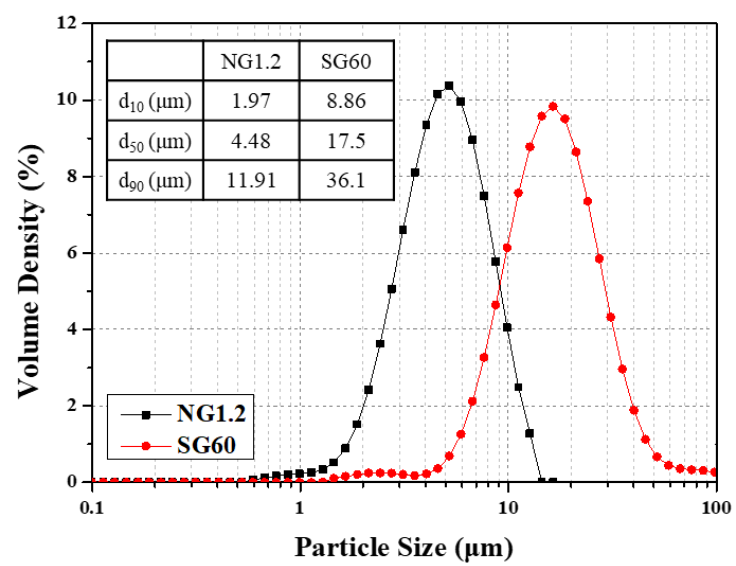

**Figure S1.** Particle size distribution of fine and assembled graphite.

**Table S2.** Average capacity and capacity retention based on the C-rate

|           | 0.1C<br>(mAh/g) | 0.2C<br>(mAh/g) | 0.5C<br>(mAh/g) | 1C<br>(mAh/g) | 2C<br>(mAh/g) | 5C<br>(mAh/g) | 0.2C*<br>(mAh/g) | 5C/0.2<br>C (%) | 0.2C*/0.2<br>C (%) |
|-----------|-----------------|-----------------|-----------------|---------------|---------------|---------------|------------------|-----------------|--------------------|
| SG0       | 366.8           | 354.0           | 353.5           | 347.8         | 305.4         | 119.3         | 352.4            | 33.7            | 99.55              |
| SG20      | 366.8           | 352.9           | 352.3           | 348.5         | 324.4         | 120.2         | 352.9            | 34.1            | 100.0              |
| SG40      | 360.0           | 354.4           | 355.5           | 352.0         | 332.8         | 149.6         | 355.8            | 42.2            | 100.4              |
| SG60      | 348.8           | 347.9           | 347.2           | 346.2         | 339.3         | 163.4         | 350.1            | 47.0            | 100.6              |
| SG10<br>0 | 346.0           | 346.4           | 345.9           | 336.8         | 318.1         | 147.0         | 347.1            | 42.5            | 100.2              |
| NG1.<br>2 | 355.1           | 352.0           | 345.3           | 329.9         | 255.4         | 85.8          | 348.9            | 24.4            | 99.13              |

**Table S3.** Electrochemical properties of assembled graphite, NG1.2 and commercial graphite: discharge capacity, first cycle Coulombic efficiency, and Retention rate.

|                                   | Capacity at the first cycle (mAhg <sup>-1</sup> ) |              |          | Retention Rate |
|-----------------------------------|---------------------------------------------------|--------------|----------|----------------|
|                                   | Discharge                                         | Irreversible | C.E. (%) | 5C/0.1C (%)    |
| SG60                              | 314                                               | 26           | 92.3     | 46.8           |
| NG1.2                             | 346                                               | 49           | 87.6     | 24.2           |
| Commercial Graphite <sup>1)</sup> | 344                                               | 46           | 88.2     | 30.0           |

<sup>1)</sup>Han, Y.-J.; Kim, J.; Yeo, J.-S.; An, J.C.; Hong, I.-P.; Nakabayashi, K.; Miyawaki, J.; Jung, J.-D.; Yoon, S.-H. Coating of graphite anode with coal tar pitch as an effective precursor for enhancing the rate performance in Li-ion batteries: Effects of composition and softening points of coal tar pitch. Carbon 2015, 94, 432-438.
